# Supplementary material for: Use of Biomarkers in Ongoing Research Protocols on Alzheimer’s Disease
Source: PubMed Central journal article supplement (PMC7564515; doi:10.3390/jpm10030068), 2020-07-24
Supplement: jpm-10-00068-s001.pdf [file jpm-10-00068-s001.pdf]

**Table S1.** Characteristics of the selected protocols registered on the clinicaltrials.gov database.

| NCT Code    | Intervention (s)                                                                                                                                                                                               | Phase           | Enrollment |
|-------------|----------------------------------------------------------------------------------------------------------------------------------------------------------------------------------------------------------------|-----------------|------------|
| NCT01224106 | Drug: Gantenerumab Drug: Placebo                                                                                                                                                                               | Phase 3         | 799        |
| NCT01300728 | Drug: NewGam 10% IVIG Other: Placebo                                                                                                                                                                           | Phase 2         | 52         |
| NCT01703117 | Drug: Riluzole Drug: Placebo                                                                                                                                                                                   | Phase 2         | 42         |
| NCT01760005 | Drug: Gantenerumab Drug: Solanezumab Drug: Matching Placebo (Gantenerumab) Drug: Matching Placebo (Solanezumab)                                                                                                | Phase 2 Phase 3 | 490        |
| NCT01767311 | Drug: BAN2401 2.5 mg/kg Drug: BAN2401 5.0 mg/kg Drug: BAN2401 10 mg/kg Drug: Placebo                                                                                                                           | Phase 2         | 856        |
| NCT01811381 | Drug: Curcumin Behavioral: Aerobic yoga Behavioral: Non aerobic yoga Dietary Supplement: Placebo                                                                                                               | Phase 2         | 80         |
| NCT01843075 | Drug: Liraglutide Drug: Placebo                                                                                                                                                                                | Phase 2         | 204        |
| NCT01998841 | Drug: Crenezumab Drug: Placebo                                                                                                                                                                                 | Phase 2         | 252        |
| NCT02008357 | Drug: Placebo Drug: Solanezumab                                                                                                                                                                                | Phase 3         | 1150       |
| NCT02033941 | Drug: Meganatural-Az Grapeseed Extract Drug: Placebo                                                                                                                                                           | Phase 2         | 20         |
| NCT02051608 | Drug: Gantenerumab Drug: Placebo                                                                                                                                                                               | Phase 3         | 389        |
| NCT02054208 | Biological: Human umbilical cord blood derived mesenchymal stem cells Other: Normal saline 2 mL                                                                                                                | Phase 1 Phase 2 | 45         |
| NCT02085265 | Drug: Perindopril Drug: Telmisartan                                                                                                                                                                            | Phase 2         | 150        |
| NCT02292238 | Drug: Benfotiamine                                                                                                                                                                                             | Phase 2         | 76         |
| NCT02547818 | Drug: ALZT-OP1a Drug: ALZT-OP1b Other: Placebo ALZT-OP1a Other: Placebo ALZT-OP1b                                                                                                                              | Phase 3         | 620        |
| NCT02600130 | Biological: Longeveron Mesenchymal Stem Cells Biological: Placebo                                                                                                                                              | Phase 1         | 33         |
| NCT02646982 | Drug: Placebo Drug: Candesartan                                                                                                                                                                                | Phase 2         | 72         |
| NCT02726906 | Behavioral: Moderate-aerobic walking Radiation: Positron Emission Tomography (PET) scan Behavioral: Healthy living education Device: Physical activity monitor                                                 | Phase 2         | 100        |
| NCT02833792 | Drug: Human Mesenchymal Stem Cells and Lactated Riunger's Solution Other: Placebo                                                                                                                              | Phase 2         | 40         |
| NCT02880956 | Drug: ABBV-8E12 Drug: Placebo for ABBV-8E12                                                                                                                                                                    | Phase 2         | 453        |
| NCT02899091 | Biological: CB-AC-02 Biological: Placebo                                                                                                                                                                       | Phase 1 Phase 2 | 24         |
| NCT02913664 | Drug: Angiotensin II receptor blocker (ARB, losartan) and calcium channel blocker (CCB, amlodipine) Behavioral: Aerobic Exercise Training Other: Usual Care Behavioral: Stretching Exercise Drug: Atorvastatin | Phase 2 Phase 3 | 513        |
| NCT02925650 | Drug: Posiphen Drug: Placebo                                                                                                                                                                                   | Phase 1 Phase 2 | 24         |
| NCT02931136 | Drug: Huperzine A Drug: Placebo                                                                                                                                                                                | Phase 4         | 300        |
| NCT02947893 | Drug: Placebo Capsule(s) Once a Day by Mouth Drug: Nilotinib Capsule(s) Once a Day by Mouth                                                                                                                    | Phase 2         | 42         |
| NCT02956486 | Drug: Elenbecestat (E2609) Drug: Placebo                                                                                                                                                                       | Phase 3         | 1181       |
| NCT03036280 | Drug: Elenbecestat (E2609) Drug: Placebo                                                                                                                                                                       | Phase 3         | 1018       |
| NCT03061474 | Drug: Nicotinamide Drug: Placebo Comparator                                                                                                                                                                    | Phase 2         | 48         |
| NCT03069014 | Drug: 400 mg LM11A-31-BHS Drug: 800 mg LM11A-31-BHS Drug: Placebos                                                                                                                                             | Phase 1 Phase 2 | 242        |
| NCT03090516 | Drug: Ginkgo biloba dispersible tablets Drug: Donepezil Drug: Ginkgo biloba dispersible tablets and Donepezil                                                                                                  | Phase 2 Phase 3 | 240        |
| NCT03094546 | Dietary Supplement: Polyamine Dietary Supplement: Placebo                                                                                                                                                      | Phase 2         | 100        |
| NCT03131453 | Drug: CNP520 50 mg Drug: CNP520 15 mg Other: Placebo to CNP520                                                                                                                                                 | Phase 2 Phase 3 | 1147       |
| NCT03172117 | Biological: human umbilical cord blood derived mesenchymal stem cells Other: Normal saline 2 mL                                                                                                                | Phase 1 Phase 2 | 45         |
| NCT03185208 | Drug: Lithium Carbonate Drug: Placebo oral capsule                                                                                                                                                             | Phase 4         | 80         |
| NCT03186989 | Drug: IONIS MAPTRx Other: Placebo                                                                                                                                                                              | Phase 1 Phase 2 | 46         |
| NCT03234686 | Drug: Deferiprone 600 mg delayed release tablets Drug: Placebo Oral Tablet                                                                                                                                     | Phase 2         | 171        |
| NCT03274817 | Drug: Escitalopram Pill Drug: Venlafaxine Pill Drug: Placebo Oral Tablet                                                                                                                                       | Phase 1         | 31         |
| NCT03277573 | Drug: Salsalate Drug: Placebo                                                                                                                                                                                  | Phase 1         | 40         |
| NCT03282916 | Drug: Valacyclovir Drug: Placebo                                                                                                                                                                               | Phase 2         | 130        |
| NCT03289143 | Drug: Semorinemab Drug: Placebo Drug: [18F] GTP1                                                                                                                                                               | Phase 2         | 457        |
| NCT03361410 | Dietary Supplement: Grape Powder Dietary Supplement: Placebo Powder                                                                                                                                            | Phase 2         | 32         |
| NCT03367403 | Drug: LY3002813 Drug: Placebo                                                                                                                                                                                  | Phase 2         | 266        |
| NCT03417986 | Drug: TEP                                                                                                                                                                                                      | Phase 2         | 100        |
| NCT03435861 | Drug: VX-745 Drug: Placebo                                                                                                                                                                                     | Phase 2         | 40         |
| NCT03441516 | Drug: Alfoatirin- $\alpha$ E Table + Aripezil- $\alpha$ E Tab. Drug: Aripezil- $\alpha$ E Tab.                                                                                                                 | Phase 4         | 79         |
| NCT03443973 | Drug: Gantenerumab Drug: Placebo                                                                                                                                                                               | Phase 3         | 1016       |
| NCT03444870 | Drug: Gantenerumab Drug: Placebo                                                                                                                                                                               | Phase 3         | 1016       |
| NCT03446001 | Drug: TRx0237 16 mg/day Drug: Placebo Drug: TRx0237 8 mg/day                                                                                                                                                   | Phase 3         | 450        |
| NCT03461276 | Biological: ABvac40 Biological: Placebo                                                                                                                                                                        | Phase 2         | 120        |
| NCT03486938 | Drug: Placebo Oral Tablet Drug: AGB101 220 mg tablet                                                                                                                                                           | Phase 3         | 830        |
| NCT03493282 | Drug: Active Treatment- CT1812 100 mg Drug: Placebo Drug: Active Treatment- CT1812 300 mg                                                                                                                      | Phase 1 Phase 2 | 23         |
| NCT03507790 | Drug: CT1812 Drug: Placebo                                                                                                                                                                                     | Phase 2         | 120        |
| NCT03518073 | Drug: LY3303560 Drug: Placebo                                                                                                                                                                                  | Phase 2         | 285        |
| NCT03522129 | Drug: CT1812 Drug: Placebo                                                                                                                                                                                     | Phase 1         | 18         |
| NCT03533257 | Drug: AMX0035 Drug: Placebo                                                                                                                                                                                    | Phase 2         | 100        |

|             |                                                                                                                                                                                                                                                                      |                 |      |
|-------------|----------------------------------------------------------------------------------------------------------------------------------------------------------------------------------------------------------------------------------------------------------------------|-----------------|------|
| NCT03634007 | Biological: AAVrh.10hPOE2 vector                                                                                                                                                                                                                                     | Phase 1         | 15   |
| NCT03649724 | Drug: Placebo Drug: Eligard 22.5 Mg Suspension for Injection                                                                                                                                                                                                         | Phase 2         | 180  |
| NCT03712787 | Drug: ABBV-8E12                                                                                                                                                                                                                                                      | Phase 2         | 360  |
| NCT03748303 | Drug: Allopregnanolone                                                                                                                                                                                                                                               | Phase 1         | 12   |
| NCT03752294 | Drug: Dabigatran Drug: Placebo—Cap                                                                                                                                                                                                                                   | Phase 1         | 40   |
| NCT03790709 | Drug: High dose ANAVEX2-73 Drug: Mid dose ANAVEX2-73 Drug: Placebo oral capsule                                                                                                                                                                                      | Phase 2 Phase 3 | 450  |
| NCT03790982 | Drug: Placebo of AD-35 60 mg/AD-35 30 mg Drug: Placebo of AD-35 60 mg/AD-35 60 mg Drug: AD-35 30 mg + Placebo of AD-35 30 mg Drug: AD-35 60 mg                                                                                                                       | Phase 2         | 240  |
| NCT03801642 | Drug: Dapagliflozin Other: Placebo                                                                                                                                                                                                                                   | Phase 1 Phase 2 | 48   |
| NCT03823404 | Drug: COR388 capsule Drug: Placebo capsule                                                                                                                                                                                                                           | Phase 2 Phase 3 | 573  |
| NCT03828747 | Drug: Semorinemab Drug: Placebo Drug: [18F] GTP1                                                                                                                                                                                                                     | Phase 2         | 260  |
| NCT03865017 | Biological: Regulatory T cells Other: Saline                                                                                                                                                                                                                         | Phase 1 Phase 2 | 20   |
| NCT03867253 | Drug: ORY-2001 Low dose Drug: ORY-2001 High dose Drug: Placebo                                                                                                                                                                                                       | Phase 2         | 33   |
| NCT03875638 | Drug: Levetiracetam Drug: Placebo oral capsule                                                                                                                                                                                                                       | Phase 2         | 85   |
| NCT03880240 | Device: Transcranial Alternating Current Stimulation (tACS) Other: Sham Transcranial Alternating Current Stimulation                                                                                                                                                 | Phase 1 Phase 2 | 55   |
| NCT03887455 | Drug: BAN2401 Drug: Placebo                                                                                                                                                                                                                                          | Phase 3         | 1566 |
| NCT03919162 | Drug: PQ912 Other: Placebo                                                                                                                                                                                                                                           | Phase 2         | 462  |
| NCT03943264 | Drug: XPro1595                                                                                                                                                                                                                                                       | Phase 1         | 18   |
| NCT03977584 | Drug: Crenezumab Drug: Placebo Other: [18F] GTP1                                                                                                                                                                                                                     | Phase 2         | 150  |
| NCT03980730 | Drug: Azeliragon Drug: Placebo                                                                                                                                                                                                                                       | Phase 2 Phase 3 | 300  |
| NCT03991988 | Drug: Montelukast Drug: Placebo oral tablet                                                                                                                                                                                                                          | Phase 2         | 150  |
| NCT04032626 | Drug: Lenalidomide 10 mg Drug: Placebos                                                                                                                                                                                                                              | Phase 2         | 30   |
| NCT04044131 | Drug: Metabolic Cofactor Supplementation Drug: Sorbitol                                                                                                                                                                                                              | Phase 2         | 120  |
| NCT04052737 | Drug: Normal Saline along with standard treatment Drug: PMZ-1620 (sovateotide) along with standard treatment                                                                                                                                                         | Phase 2         | 80   |
| NCT04070378 | Drug: Daratumumab Injection                                                                                                                                                                                                                                          | Phase 2         | 15   |
| NCT04079803 | Drug: Placebo oral tablet Drug: PTI-125 50 mg tablet Drug: PTI-125 100 mg oral tablet                                                                                                                                                                                | Phase 2         | 60   |
| NCT04149860 | Drug: Lu AF87908 Drug: Placebo                                                                                                                                                                                                                                       | Phase 1         | 96   |
| NCT04187547 | Drug: Tricaprilin Drug: Placebo                                                                                                                                                                                                                                      | Phase 3         | 300  |
| NCT04191486 | Drug: T-817MA Drug: Placebo                                                                                                                                                                                                                                          | Phase 2         | 200  |
| NCT04205539 | Drug: Dexmedetomidine                                                                                                                                                                                                                                                | Phase 1         | 50   |
| NCT04228666 | Drug: HB-adMSCs                                                                                                                                                                                                                                                      | Phase 1 Phase 2 | 24   |
| NCT04241068 | Drug: Aducanumab                                                                                                                                                                                                                                                     | Phase 3         | 2400 |
| NCT04263519 | Drug: Tacrolimus                                                                                                                                                                                                                                                     | Phase 2         | 12   |
| NCT04311515 | Radiation: Tau Positron emission tomography (PET) Radiation: Fluorodeoxyglucose (FDG) Positron emission tomography (PET) Diagnostic Test: Cerebrospinal fluid (CSF) Biomarkers Diagnostic Test: Blood Biomarkers Behavioral: Rating Scales Drug: PU-AD Drug: Placebo | Phase 2         | 150  |
| NCT04314934 | Drug: ANAVEX2-73                                                                                                                                                                                                                                                     | Phase 2 Phase 3 | 450  |
| NCT04339413 | Drug: Gantenerumab                                                                                                                                                                                                                                                   | Phase 3         | 173  |
| NCT04374253 | Drug: Gantenerumab                                                                                                                                                                                                                                                   | Phase 3         | 2032 |
| NCT04381468 | Drug: Pepinemab Drug: Placebo                                                                                                                                                                                                                                        | Phase 1 Phase 2 | 60   |
